# Supplementary material for: A dielectric and spectrophotometric study of the tautomerization of 2-hydroxypyridine and 2-mercaptopyridine in water
Source: PubMed Central journal article supplement (PMC9048638; doi:10.1039/c9ra08392h), 2020-01-13
Supplement: RA-010-C9RA08392H-s001.pdf [file RA-010-C9RA08392H-s001.pdf]

# Supplementary Information:

## A Dielectric and Spectrophotometric Study of the tautomerization of 2- Hydroxypyridine and 2- Mercaptopyridine in water

*Biswadeep Bomzon, Yashita, Khunger, Ranga Subramanian\**

Department of Chemistry,

Indian Institute of Technology Patna, Bihar- 801106

India

## Supporting Information Available

### 1) Sample preparation:

A. 15.9 mg of 2-hydroxypyridine was weighed using Mettler Toledo, ME204, and dissolved in triple-distilled water in a calibrated 10 ml volumetric flask to make a stock solution of  $16.824 \times 10^{-3}$  M. This stock solution was then diluted further to make 19 solutions of different concentrations from the range of  $0.168 \times 10^{-5}$  M to  $11.777 \times 10^{-5}$  M.

18.7 mg of 2- mercaptopyridine were weighed using the ME204, and 10 ml of  $16.824 \times 10^{-3}$ M solutions were made, which was used as a stock solution to prepare different solutions from  $0.168 \times 10^{-5}$  M to  $11.777 \times 10^{-5}$  M, 2MPy solutions.

1.7 $\mu$ l 2- methoxypyridine was used to prepare the 10ml of  $16.824 \times 10^{-2}$ M stock solution, which was then used to prepare a solution of  $1.682 \times 10^{-5}$ M concentration for spectrophotometric determination of  $pK_{1(OMe)}$ .

17.7 $\mu$ l of 2- (methylthio) pyridine was used to prepare 10 ml of  $16.824 \times 10^{-2}$ M stock solution, which was diluted to prepare 10 ml of  $1.682 \times 10^{-4}$ M solutions for spectrophotometric determination of  $pK_{1(SMe)}$ . Similarly, 16.9 $\mu$ l of N- methyl - 2- pyridone was dissolved in 10 ml of triple distilled water to prepare  $16.824 \times 10^{-2}$ M stock solution, and it was diluted to prepare  $1.682 \times 10^{-4}$ M solutions for the determination of  $pK_{1(NMe)}$ .

### 2) Standardization of NaOH and HCl solutions:

Oxalic acid dihydrate (Sigma Aldrich, with  $\geq 99\%$ ) was used to standardize the NaOH solutions using the phenolphthalein indicator. The same NaOH was then used to standardize the HCl solutions using the same indicator.

Table S1. Determination of the basic ionization constant or  $pK_1$  of 2 – hydroxypyridine:

Concentration:  $1.682 \times 10^{-5}$  M.

Analytical wavelength = 270 nm. Cells: 1 cm.

pH for absorption of neutral molecule ( $A_M$ ) = 10.12

pH for absorption of cation ( $A_I$ ) = -1.68<sup>1</sup>

$$pK_1 = pH + \log \frac{A - A_M}{A_I - A}$$

| Sl. No. | pH of Buffer | $A_M$  | $A_I$  | A      | $pK_1$ |
|---------|--------------|--------|--------|--------|--------|
| 1       | 0.75         | 0.0377 | 0.1145 | 0.0765 | 0.76   |
| 2       | 0.57         | 0.0377 | 0.1145 | 0.0854 | 0.78   |
| 3       | 0.97         | 0.0377 | 0.1145 | 0.0668 | 0.75   |

Average  $pK_1 = 0.76 \pm 0.01$ , literature value = 0.75<sup>2</sup>

Table S2. Determination of the acidic ionization constant or  $pK_2$  of 2 – hydroxypyridine:

Concentration:  $1.682 \times 10^{-5}$  M.

Analytical wavelength = 234 nm. Cells: 1 cm.

pH for absorption of neutral molecule ( $A_M$ ) = 2.72

pH for absorption of anion ( $A_I$ ) = 13.84

$$pK_2 = pH + \log \frac{A_I - A}{A - A_M}$$

| Sl. No. | pH of Buffer | $A_M$  | $A_I$  | A      | $pK_2$ |
|---------|--------------|--------|--------|--------|--------|
| 1       | 11.59        | 0.0346 | 0.1251 | 0.0537 | 12.16  |
| 2       | 11.43        | 0.0346 | 0.1251 | 0.0498 | 12.12  |
| 3       | 11.83        | 0.0346 | 0.1251 | 0.0642 | 12.14  |

Average  $pK_2 = 12.14 \pm 0.02$ , literature value = 11.62<sup>2</sup>

Table S3. Determination of the acidic ionization constant or  $pK_2$  of 2 – mercaptopyridine:

Concentration:  $1.682 \times 10^{-5}$  M.

Analytical wavelength = 255 nm. Cells: 1 cm.

pH for absorption of neutral molecule ( $A_M$ ) = 2.86

pH for absorption of anion ( $A_I$ ) = 12.58

$$pK_2 = pH + \log \frac{A_I - A}{A - A_M}$$

| Sl. No. | pH of Buffer | $A_M$  | $A_I$  | A      | $pK_2$ |
|---------|--------------|--------|--------|--------|--------|
| 1       | 9.80         | 0.0741 | 0.1783 | 0.1085 | 10.11  |
| 2       | 9.61         | 0.0741 | 0.1783 | 0.0998 | 10.09  |
| 3       | 10.00        | 0.0741 | 0.1783 | 0.1199 | 10.10  |

Average  $pK_2 = 10.10 \pm 0.01$ , literature value = 9.81 <sup>3</sup>

Table S4. Determination of the basic ionization constant or  $pK_{1(XMe)}$  of 2 – Methoxypyridine: (X = O)

Concentration:  $1.682 \times 10^{-5}$  M.

Analytical wavelength = 283 nm. Cells: 1 cm.

pH for absorption of neutral molecule ( $A_M$ ) = 11.64

pH for absorption of anion ( $A_I$ ) = 0.52

$$pK_{XMe} = pH + \log \frac{A - A_M}{A_I - A}$$

| Sl. No. | pH of Buffer | $A_M$  | $A_I$  | A      | $pK_{1(XMe)}$ |
|---------|--------------|--------|--------|--------|---------------|
| 1       | 3.27         | 0.0023 | 0.0153 | 0.0087 | 3.26          |
| 2       | 3.08         | 0.0023 | 0.0153 | 0.010  | 3.24          |
| 3       | 3.49         | 0.0023 | 0.0153 | 0.0070 | 3.24          |

Average  $pK_{1(XMe)} = 3.25 \pm 0.01$ , literature value = 3.28 <sup>2</sup>

Table S5. Determination of the basic ionization constant or  $pK_{1(NMe)}$  of N- Methyl- 2-Pyridone:

Concentration:  $1.682 \times 10^{-4}$  M.

Analytical wavelength = 272 nm. Cells: 1 cm.

pH for absorption of neutral molecule ( $A_M$ ) = 11.54

pH for absorption of anion ( $A_I$ ) = -1.68<sup>1</sup>

$$pK_{NMe} = pH + \log \frac{A - A_M}{A_I - A}$$

| Sl. No. | pH of Buffer | $A_M$  | $A_I$  | A      | $pK_{1(NMe)}$ |
|---------|--------------|--------|--------|--------|---------------|
| 1       | 0.33         | 0.0411 | 0.1233 | 0.0812 | 0.31          |
| 2       | 0.12         | 0.0411 | 0.1233 | 0.0917 | 0.32          |
| 3       | 0.52         | 0.0411 | 0.1233 | 0.0726 | 0.31          |

Average  $pK_{1(NMe)} = 0.31 \pm 0.01$ , literature value = 0.32<sup>2</sup>

Table S6. Determination of the basic ionization constant or  $pK_{1(XMe)}$  of 2- Methylthiopyridine: (X= S)

Concentration:  $1.682 \times 10^{-4}$  M.

Analytical wavelength = 283 nm. Cells: 1 cm.

pH for absorption of neutral molecule ( $A_M$ ) = 11.60

pH for absorption of anion ( $A_I$ ) = 1.07

$$pK_{XMe} = pH + \log \frac{A_M - A}{A - A_I}$$

| Sl. No. | pH of Buffer | $A_M$  | $A_I$  | A      | $pK_{1(XMe)}$ |
|---------|--------------|--------|--------|--------|---------------|
| 1       | 3.59         | 0.0577 | 0.0226 | 0.0446 | 3.36          |
| 2       | 3.39         | 0.0577 | 0.0226 | 0.0405 | 3.37          |
| 3       | 3.78         | 0.0577 | 0.0226 | 0.0477 | 3.38          |

Average  $pK_{1(XMe)} = 3.37 \pm 0.01$ , literature value = 3.59<sup>4</sup>

Table S7. Comparison of  $\epsilon_a$  values obtained from the fitting of dielectric spectra to Debye equation (equation (5)) and equation (6) of 2- hydroxypyridine.

| Sl. No. | Concentration<br>( $10^{-5}$ M) | Obtained from<br>equation (5) | Obtained from<br>equation (6) |
|---------|---------------------------------|-------------------------------|-------------------------------|
| 1       | Water                           | $5.38(2) \pm 0.10$            | $5.6(4) \pm 0.4$              |
| 2       | 0.168                           | $5.80(2) \pm 0.77$            | $8.7(2) \pm 0.3$              |
| 3       | 0.252                           | $5.29(1) \pm 0.30$            | $7.0(1) \pm 0.9$              |
| 4       | 0.330                           | $3.09(2) \pm 3.02$            | $6.9(2) \pm 1.5$              |
| 5       | 0.421                           | $4.95(1) \pm 0.21$            | $6.3(2) \pm 0.4$              |
| 6       | 0.505                           | $4.79(2) \pm 0.18$            | $6.7(1) \pm 1.1$              |
| 7       | 0.673                           | $5.47(2) \pm 0.50$            | $6.3(2) \pm 1.0$              |
| 8       | 0.841                           | $4.95(1) \pm 0.37$            | $7.1 (1) \pm 1.3$             |
| 9       | 1.001                           | $5.50(1) \pm 0.53$            | $7.4(1) \pm 0.9$              |
| 10      | 1.178                           | $5.06(2) \pm 0.09$            | $6.5(2) \pm 0.7$              |
| 11      | 1.346                           | $5.18(1) \pm 0.13$            | $6.6(2) \pm 0.9$              |
| 12      | 1.430                           | $4.72(1) \pm 0.53$            | $6.2(1) \pm 0.5$              |
| 13      | 1.514                           | $4.49(1) \pm 0.47$            | $5.6(1) \pm 0.9$              |
| 14      | 1.682                           | $5.11(1) \pm 0.08$            | $7.9(2) \pm 0.2$              |
| 15      | 3.365                           | $4.92(1) \pm 0.22$            | $6.3(1) \pm 0.4$              |
| 16      | 5.047                           | $5.13(1) \pm 0.40$            | $6.9(1) \pm 0.7$              |
| 17      | 6.730                           | $4.94(1) \pm 0.31$            | $6.7(1) \pm 0.3$              |
| 18      | 8.412                           | $5.06(1) \pm 0.29$            | $5.9(1) \pm 1.2$              |
| 19      | 10.090                          | $5.37(1) \pm 0.85$            | $7.3(2) \pm 0.9$              |
| 20      | 11.777                          | $5.08(2) \pm 0.07$            | $8.2(2) \pm 1.0$              |
| 21      | 50.000                          | $5.50 (2) \pm 0.39$           | $6.4 (2) \pm 0.4$             |
| 22      | 100.00                          | $5.80 (2) \pm 0.54$           | $7.3 (3) \pm 0.4$             |
| 23      | 500.00                          | $5.89 (2) \pm 0.56$           | $6.8 (2)\pm 0.4$              |
| 24      | 1000.0                          | $5.76 (1) \pm 0.23$           | $6.7 (1)\pm 0.4$              |

Table S8. Comparison of  $\Delta\epsilon$  values obtained from the fitting of dielectric spectra to equation (5) and taking a difference of  $\epsilon_s$  (from Equation (7)) and  $\epsilon_\alpha$  (from Equation (6)) of 2-hydroxypyridine.

| Sl. No. | Concentration<br>( $10^{-5}$ M) | Obtained from<br>equation (5) | Obtained from<br>$\Delta\epsilon = \epsilon_s - \epsilon_\alpha$ |
|---------|---------------------------------|-------------------------------|------------------------------------------------------------------|
| 1       | Water                           | 73.24(2) $\pm$ 0.07           | 73.0(4) $\pm$ 0.3                                                |
| 2       | 0.168                           | 73.63(1) $\pm$ 0.58           | 70.8(2) $\pm$ 0.7                                                |
| 3       | 0.252                           | 73.50(1) $\pm$ 0.31           | 71.8(1) $\pm$ 1.1                                                |
| 4       | 0.330                           | 73.97(2) $\pm$ 0.36           | 70.1(2) $\pm$ 2.2                                                |
| 5       | 0.421                           | 73.90(1) $\pm$ 0.72           | 72.5(2) $\pm$ 0.3                                                |
| 6       | 0.505                           | 72.55(1) $\pm$ 0.39           | 71.6(1) $\pm$ 1.0                                                |
| 7       | 0.673                           | 72.83(2) $\pm$ 0.20           | 71.8(2) $\pm$ 0.5                                                |
| 8       | 0.841                           | 73.03(1) $\pm$ 0.49           | 70.9(1) $\pm$ 0.5                                                |
| 9       | 1.001                           | 73.06(1) $\pm$ 0.61           | 71.2(1) $\pm$ 0.6                                                |
| 10      | 1.178                           | 73.55(2) $\pm$ 0.30           | 72.1(2) $\pm$ 0.4                                                |
| 11      | 1.346                           | 73.44(1) $\pm$ 0.41           | 72.0(2) $\pm$ 0.9                                                |
| 12      | 1.430                           | 73.60(1) $\pm$ 0.44           | 73.1(1) $\pm$ 0.5                                                |
| 13      | 1.514                           | 73.47(1) $\pm$ 0.79           | 71.1(1) $\pm$ 1.9                                                |
| 14      | 1.682                           | 72.92(1) $\pm$ 0.39           | 70.1(2) $\pm$ 0.6                                                |
| 15      | 3.365                           | 73.20(1) $\pm$ 0.27           | 71.7(1) $\pm$ 0.5                                                |
| 16      | 5.047                           | 73.48(1) $\pm$ 0.32           | 71.7(1) $\pm$ 0.9                                                |
| 17      | 6.730                           | 73.41(1) $\pm$ 0.56           | 71.7(1) $\pm$ 0.2                                                |
| 18      | 8.412                           | 73.21(1) $\pm$ 0.72           | 72.3(1) $\pm$ 0.7                                                |
| 19      | 10.090                          | 73.04(1) $\pm$ 0.36           | 71.1(2) $\pm$ 0.6                                                |
| 20      | 11.777                          | 73.38(1) $\pm$ 0.45           | 70.3(2) $\pm$ 1.3                                                |
| 21      | 50.000                          | 73.23(2) $\pm$ 0.57           | 72.3(3) $\pm$ 0.5                                                |
| 22      | 100.00                          | 73.64(2) $\pm$ 0.44           | 71.1(2) $\pm$ 0.3                                                |
| 23      | 500.00                          | 72.75(2) $\pm$ 0.61           | 71.8(1) $\pm$ 0.4                                                |
| 24      | 1000.0                          | 72.63(1) $\pm$ 0.59           | 71.7(3) $\pm$ 0.3                                                |

Table S9. Comparison of  $\epsilon_s$  values obtained from the fitting of dielectric spectra to equation (5) and equation (7) of 2- hydroxypyridine.

| Sl. No. | Concentration<br>( $10^{-5}$ M) | Obtained from<br>equation (5) | Obtained from<br>equation (7) |
|---------|---------------------------------|-------------------------------|-------------------------------|
| 1       | Water                           | 78.61(4) $\pm$ 0.17           | 78.64(1) $\pm$ 0.18           |
| 2       | 0.168                           | 79.43(3) $\pm$ 0.70           | 79.42(1) $\pm$ 0.68           |
| 3       | 0.252                           | 78.80(2) $\pm$ 0.58           | 78.81(4) $\pm$ 0.57           |
| 4       | 0.330                           | 77.05(4) $\pm$ 2.69           | 77.05(1) $\pm$ 2.70           |
| 5       | 0.421                           | 78.86(2) $\pm$ 0.59           | 78.85(2) $\pm$ 0.59           |
| 6       | 0.505                           | 78.34(3) $\pm$ 0.48           | 78.34(1) $\pm$ 0.48           |
| 7       | 0.673                           | 78.22(4) $\pm$ 0.42           | 78.13(1) $\pm$ 0.51           |
| 8       | 0.841                           | 77.99(2) $\pm$ 0.86           | 77.99(5) $\pm$ 0.84           |
| 9       | 1.001                           | 78.57(2) $\pm$ 0.62           | 78.56(1) $\pm$ 0.62           |
| 10      | 1.178                           | 78.62(4) $\pm$ 0.38           | 78.63(1) $\pm$ 0.37           |
| 11      | 1.346                           | 78.62(2) $\pm$ 0.54           | 78.64(2) $\pm$ 0.53           |
| 12      | 1.430                           | 78.31(2) $\pm$ 0.14           | 78.36(4) $\pm$ 0.11           |
| 13      | 1.514                           | 77.96(2) $\pm$ 1.20           | 78.97(2) $\pm$ 0.39           |
| 14      | 1.682                           | 78.02(2) $\pm$ 0.46           | 78.04(4) $\pm$ 0.45           |
| 15      | 3.365                           | 78.12(2) $\pm$ 0.43           | 77.93(3) $\pm$ 0.13           |
| 16      | 5.047                           | 78.61(2) $\pm$ 0.39           | 78.61(4) $\pm$ 0.38           |
| 17      | 6.730                           | 78.34(2) $\pm$ 0.26           | 78.36(2) $\pm$ 0.26           |
| 18      | 8.412                           | 78.28(2) $\pm$ 0.54           | 78.27(3) $\pm$ 0.52           |
| 19      | 10.090                          | 78.42(2) $\pm$ 0.50           | 78.39(4) $\pm$ 0.49           |
| 20      | 11.777                          | 78.46(3) $\pm$ 0.39           | 78.47(1) $\pm$ 0.39           |
| 21      | 50.000                          | 78.74(2) $\pm$ 0.08           | 78.70(3) $\pm$ 0.43           |
| 22      | 100.00                          | 78.45(2) $\pm$ 0.24           | 78.24(2) $\pm$ 0.16           |
| 23      | 500.00                          | 78.65(2) $\pm$ 0.23           | 78.59(1) $\pm$ 0.04           |
| 24      | 1000.0                          | 78.38(1) $\pm$ 0.39           | 78.46(3) $\pm$ 0.05           |



Table S10. Comparison of  $\tau$  values obtained from the fitting of dielectric spectra to equation (5) and equation (6) and (7) of solutions 2- hydroxypyridine.

| Sl. No. | Concentration ( $10^{-5}$ M) | Obtained from equation (5) | Obtained from equation (6) | Obtained from equation (7) |
|---------|------------------------------|----------------------------|----------------------------|----------------------------|
| 1       | Water                        | $8.320(3) \pm 0.015$       | $8.356(1) \pm 0.068$       | $8.321(3) \pm 0.018$       |
| 2       | 0.168                        | $8.273(3) \pm 0.129$       | $8.527(2) \pm 0.171$       | $8.267(2) \pm 0.115$       |
| 3       | 0.252                        | $7.747(1) \pm 0.227$       | $8.166(5) \pm 0.151$       | $7.962(1) \pm 0.262$       |
| 4       | 0.330                        | $7.702(3) \pm 0.392$       | $8.272(2) \pm 0.405$       | $7.686(3) \pm 0.397$       |
| 5       | 0.421                        | $7.973(2) \pm 0.083$       | $8.072(4) \pm 0.098$       | $7.979(2) \pm 0.083$       |
| 6       | 0.505                        | $8.013(3) \pm 0.189$       | $8.298(3) \pm 0.362$       | $8.022(2) \pm 0.181$       |
| 7       | 0.673                        | $8.017(3) \pm 0.199$       | $8.129(3) \pm 0.286$       | $8.011(3) \pm 0.173$       |
| 8       | 0.841                        | $8.053(2) \pm 0.115$       | $8.385(3) \pm 0.270$       | $8.056(2) \pm 0.111$       |
| 9       | 1.001                        | $7.997(2) \pm 0.188$       | $8.268(5) \pm 0.223$       | $7.995(2) \pm 0.190$       |
| 10      | 1.178                        | $7.927(3) \pm 0.109$       | $8.141(2) \pm 0.225$       | $7.952(3) \pm 0.163$       |
| 11      | 1.346                        | $7.977(1) \pm 0.121$       | $8.187(3) \pm 0.012$       | $7.986(1) \pm 0.115$       |
| 12      | 1.430                        | $8.047(2) \pm 0.115$       | $8.242(3) \pm 0.150$       | $8.075(2) \pm 0.114$       |
| 13      | 1.514                        | $8.017(2) \pm 0.140$       | $8.178(4) \pm 0.206$       | $8.028(2) \pm 0.130$       |
| 14      | 1.682                        | $8.007(2) \pm 0.060$       | $8.433(2) \pm 0.093$       | $8.019(2) \pm 0.057$       |
| 15      | 3.365                        | $8.040(1) \pm 0.127$       | $8.240(3) \pm 0.067$       | $8.047(1) \pm 0.115$       |
| 16      | 5.047                        | $8.017(1) \pm 0.142$       | $8.304(5) \pm 0.132$       | $8.023(1) \pm 0.131$       |
| 17      | 6.730                        | $7.877(1) \pm 0.165$       | $8.120(3) \pm 0.134$       | $7.889(1) \pm 0.156$       |
| 18      | 8.412                        | $8.067(1) \pm 0.146$       | $8.190(1) \pm 0.297$       | $8.064(1) \pm 0.293$       |
| 19      | 10.09                        | $7.977(2) \pm 0.311$       | $8.253(3) \pm 0.288$       | $7.985(2) \pm 0.015$       |
| 20      | 11.777                       | $8.093(3) \pm 0.144$       | $8.586(2) \pm 0.054$       | $8.095(2) \pm 0.015$       |
| 21      | 50.000                       | $8.340(2) \pm 0.062$       | $8.479(3) \pm 0.059$       | $8.333(4) \pm 0.066$       |
| 22      | 100.00                       | $8.407(1) \pm 0.020$       | $8.649(4) \pm 0.114$       | $8.398(1) \pm 0.028$       |
| 23      | 500.00                       | $8.390(3) \pm 0.071$       | $8.529(1) \pm 0.092$       | $8.380(2) \pm 0.069$       |
| 24      | 1000.0                       | $8.343(3) \pm 0.104$       | $8.479(2) \pm 0.120$       | $8.339(1) \pm 0.102$       |

Table S11. Comparison of  $\epsilon_a$  values obtained from the fitting of dielectric spectra to equation (5) and equation (6) of 2- mercaptopyridine.

| Sl. No. | Concentration<br>( $10^{-5}$ M) | Obtained from<br>equation (5) | Obtained from<br>equation (6) |
|---------|---------------------------------|-------------------------------|-------------------------------|
| 1       | Water                           | $5.38(2) \pm 0.10$            | $5.6(4) \pm 0.4$              |
| 2       | 0.168                           | $4.80(2) \pm 0.35$            | $6.0(1) \pm 0.8$              |
| 3       | 0.252                           | $5.52(4) \pm 0.31$            | $6.3(2) \pm 0.5$              |
| 4       | 0.336                           | $5.49(3) \pm 1.20$            | $6.3(1) \pm 2.7$              |
| 5       | 0.421                           | $5.32(3) \pm 0.16$            | $7.0(2) \pm 0.2$              |
| 6       | 0.505                           | $5.75(2) \pm 0.31$            | $6.3(1) \pm 0.4$              |
| 7       | 0.673                           | $4.72(3) \pm 0.27$            | $8.5(3) \pm 0.7$              |
| 8       | 0.841                           | $5.07(3) \pm 0.42$            | $6.3(1) \pm 1.0$              |
| 9       | 1.009                           | $4.79(3) \pm 0.88$            | $5.9(1) \pm 1.7$              |
| 10      | 1.178                           | $5.69(2) \pm 0.29$            | $5.9(4) \pm 0.7$              |
| 11      | 1.346                           | $5.43(3) \pm 0.49$            | $8.0(2) \pm 0.9$              |
| 12      | 1.430                           | $4.86(2) \pm 0.01$            | $5.7(1) \pm 0.1$              |
| 13      | 1.514                           | $5.52(3) \pm 0.14$            | $7.4(2) \pm 0.2$              |
| 14      | 1.682                           | $4.73(3) \pm 0.07$            | $5.9(2) \pm 0.0$              |
| 15      | 3.365                           | $5.03(2) \pm 0.12$            | $5.6(1) \pm 0.2$              |
| 16      | 5.047                           | $4.76(1) \pm 0.03$            | $5.7(5) \pm 1.8$              |
| 17      | 6.730                           | $5.04(2) \pm 0.09$            | $5.2(1) \pm 0.2$              |
| 18      | 8.412                           | $5.80(4) \pm 0.42$            | $6.7(1) \pm 1.3$              |
| 19      | 10.094                          | $5.56(3) \pm 0.20$            | $7.7(2) \pm 0.2$              |
| 20      | 11.776                          | $4.80(3) \pm 0.30$            | $4.6(1) \pm 0.8$              |
| 21      | 50.000                          | $5.24(2) \pm 0.57$            | $6.3(3) \pm 0.9$              |
| 22      | 100.00                          | $4.65(2) \pm 0.44$            | $6.1(2) \pm 1.1$              |
| 23      | 500.00                          | $4.87(2) \pm 0.61$            | $6.6(1) \pm 0.9$              |
| 24      | 1000.0                          | $5.43(1) \pm 0.59$            | $6.1(3) \pm 0.5$              |

Table S12. Comparison of  $\Delta\varepsilon$  values obtained from the fitting of dielectric spectra to equation (5) and taking a difference of  $\varepsilon_s$  (from Equation (7)) and  $\varepsilon_\alpha$  (from Equation (6)) of 2-mercaptopyridine.

| Sl. No. | Concentration<br>( $10^{-5}$ M) | Obtained from<br>equation (5) | Obtained from<br>$\Delta\varepsilon = \varepsilon_s - \varepsilon_\alpha$ |
|---------|---------------------------------|-------------------------------|---------------------------------------------------------------------------|
| 1       | Water                           | 73.24(2) $\pm$ 0.07           | 73.0(4) $\pm$ 0.3                                                         |
| 2       | 0.168                           | 73.15(1) $\pm$ 0.40           | 71.9(1) $\pm$ 0.7                                                         |
| 3       | 0.252                           | 74.06(3) $\pm$ 0.80           | 73.3(2) $\pm$ 1.0                                                         |
| 4       | 0.336                           | 73.37(3) $\pm$ 1.70           | 72.5(1) $\pm$ 3.3                                                         |
| 5       | 0.421                           | 73.40(2) $\pm$ 0.17           | 71.7(4) $\pm$ 0.2                                                         |
| 6       | 0.505                           | 72.61(1) $\pm$ 0.47           | 72.0(2) $\pm$ 0.5                                                         |
| 7       | 0.673                           | 73.34(2) $\pm$ 0.48           | 69.6(3) $\pm$ 1.0                                                         |
| 8       | 0.841                           | 73.13(3) $\pm$ 0.90           | 71.8(1) $\pm$ 1.5                                                         |
| 9       | 1.009                           | 73.47(2) $\pm$ 1.32           | 72.2(1) $\pm$ 2.2                                                         |
| 10      | 1.178                           | 73.24(1) $\pm$ 0.41           | 72.9(5) $\pm$ 0.8                                                         |
| 11      | 1.346                           | 72.04(3) $\pm$ 0.52           | 69.3(2) $\pm$ 0.9                                                         |
| 12      | 1.430                           | 73.55(2) $\pm$ 0.20           | 72.6(1) $\pm$ 0.2                                                         |
| 13      | 1.514                           | 72.71(3) $\pm$ 0.22           | 70.7(2) $\pm$ 0.2                                                         |
| 14      | 1.682                           | 74.38(2) $\pm$ 0.26           | 73.4(2) $\pm$ 0.4                                                         |
| 15      | 3.365                           | 73.56(2) $\pm$ 0.31           | 73.0(1) $\pm$ 0.2                                                         |
| 16      | 5.047                           | 73.20(1) $\pm$ 1.05           | 72.3(1) $\pm$ 2.9                                                         |
| 17      | 6.730                           | 73.69(2) $\pm$ 0.17           | 73.6(1) $\pm$ 0.5                                                         |
| 18      | 8.412                           | 72.20(3) $\pm$ 1.30           | 71.3(1) $\pm$ 2.3                                                         |
| 19      | 10.094                          | 72.14(2) $\pm$ 0.34           | 69.9(2) $\pm$ 0.4                                                         |
| 20      | 11.776                          | 74.07(2) $\pm$ 0.60           | 74.3(1) $\pm$ 1.2                                                         |
| 21      | 50.000                          | 73.48(2) $\pm$ 0.57           | 72.4(3) $\pm$ 0.8                                                         |
| 22      | 100.00                          | 73.54(2) $\pm$ 0.44           | 72.2(2) $\pm$ 1.0                                                         |
| 23      | 500.00                          | 72.73(2) $\pm$ 0.61           | 72.0(1) $\pm$ 0.9                                                         |
| 24      | 1000.0                          | 73.03(1) $\pm$ 0.59           | 72.4(3) $\pm$ 0.6                                                         |

Table S13. Comparison of  $\epsilon_s$  values obtained from the fitting of dielectric spectra to equation (5) and equation (7) of 2- mercaptopyridine.

| Sl. No. | Concentration<br>( $10^{-5}$ M) | Obtained from<br>equation (5) | Obtained from<br>equation (7) |
|---------|---------------------------------|-------------------------------|-------------------------------|
| 1       | Water                           | 78.61(4) $\pm$ 0.17           | 78.64(1) $\pm$ 0.18           |
| 2       | 0.168                           | 77.95(3) $\pm$ 0.16           | 77.94(1) $\pm$ 0.09           |
| 3       | 0.252                           | 79.57(1) $\pm$ 0.52           | 79.59(2) $\pm$ 0.24           |
| 4       | 0.336                           | 78.83(1) $\pm$ 0.48           | 78.82(1) $\pm$ 0.34           |
| 5       | 0.421                           | 78.73(5) $\pm$ 0.05           | 78.73(1) $\pm$ 0.03           |
| 6       | 0.505                           | 78.37(3) $\pm$ 0.42           | 78.32(1) $\pm$ 0.17           |
| 7       | 0.673                           | 78.07(5) $\pm$ 0.24           | 78.06(1) $\pm$ 0.06           |
| 8       | 0.841                           | 78.20(1) $\pm$ 0.51           | 78.17(1) $\pm$ 0.26           |
| 9       | 1.009                           | 78.23(5) $\pm$ 0.52           | 78.22(1) $\pm$ 0.26           |
| 10      | 1.178                           | 78.93(3) $\pm$ 0.24           | 78.59(1) $\pm$ 0.05           |
| 11      | 1.346                           | 77.61(1) $\pm$ 0.15           | 77.38(1) $\pm$ 0.4            |
| 12      | 1.430                           | 78.41(3) $\pm$ 0.19           | 78.39(1) $\pm$ 0.04           |
| 13      | 1.514                           | 78.22(1) $\pm$ 0.14           | 78.21(1) $\pm$ 0.02           |
| 14      | 1.682                           | 79.12(5) $\pm$ 0.30           | 79.11(1) $\pm$ 0.09           |
| 15      | 3.365                           | 78.90(4) $\pm$ 0.07           | 78.61(1) $\pm$ 0.19           |
| 16      | 5.047                           | 77.87(3) $\pm$ 1.13           | 77.95(1) $\pm$ 1.09           |
| 17      | 6.730                           | 78.74(4) $\pm$ 0.26           | 78.74(1) $\pm$ 0.07           |
| 18      | 8.412                           | 78.00(1) $\pm$ 0.99           | 78.00(1) $\pm$ 1.01           |
| 19      | 10.094                          | 77.71(5) $\pm$ 0.18           | 77.66(2) $\pm$ 0.04           |
| 20      | 11.776                          | 78.87(5) $\pm$ 0.43           | 78.87(1) $\pm$ 0.20           |
| 21      | 50.000                          | 78.72(2) $\pm$ 0.44           | 78.70(3) $\pm$ 0.4            |
| 22      | 100.00                          | 78.18(2) $\pm$ 0.10           | 78.24(2) $\pm$ 0.2            |
| 23      | 500.00                          | 78.60(2) $\pm$ 0.04           | 78.59(1) $\pm$ 0.1            |
| 24      | 1000.0                          | 78.46(1) $\pm$ 0.21           | 78.46(3) $\pm$ 0.2            |

Table S14. Comparison of  $\tau$  values obtained from the fitting of dielectric spectra to equation (5) and equation (6) and (7) of solutions 2- mercaptopyridine.

| Sl. No. | Concentration<br>( $10^{-5}$ M) | Obtained from<br>equation (5) | Obtained from<br>equation (6) | Obtained from<br>equation (7) |
|---------|---------------------------------|-------------------------------|-------------------------------|-------------------------------|
| 1       | Water                           | $8.320(3) \pm 0.015$          | $8.356(1) \pm 0.068$          | $8.321(3) \pm 0.018$          |
| 2       | 0.168                           | $8.043(2) \pm 0.115$          | $8.242(4) \pm 0.058$          | $8.041(2) \pm 0.106$          |
| 3       | 0.252                           | $8.337(1) \pm 0.104$          | $8.432(2) \pm 0.119$          | $8.350(1) \pm 0.104$          |
| 4       | 0.330                           | $8.150(5) \pm 0.265$          | $8.311(3) \pm 0.141$          | $8.127(5) \pm 0.208$          |
| 5       | 0.421                           | $8.360(5) \pm 0.037$          | $8.633(2) \pm 0.534$          | $8.383(4) \pm 0.063$          |
| 6       | 0.505                           | $8.280(3) \pm 0.043$          | $8.373(4) \pm 0.017$          | $8.253(3) \pm 0.035$          |
| 7       | 0.673                           | $8.030(4) \pm 0.082$          | $8.631(2) \pm 0.064$          | $8.025(4) \pm 0.078$          |
| 8       | 0.841                           | $8.093(5) \pm 0.074$          | $8.300(4) \pm 0.170$          | $8.079(1) \pm 0.062$          |
| 9       | 1.001                           | $8.040(4) \pm 0.115$          | $8.238(1) \pm 0.185$          | $8.019(5) \pm 0.108$          |
| 10      | 1.178                           | $8.283(3) \pm 0.083$          | $8.323(1) \pm 0.268$          | $8.268(3) \pm 0.069$          |
| 11      | 1.346                           | $8.047(5) \pm 0.085$          | $8.488(2) \pm 0.140$          | $7.994(5) \pm 0.066$          |
| 12      | 1.430                           | $8.053(3) \pm 0.009$          | $8.188(4) \pm 0.172$          | $8.045(3) \pm 0.004$          |
| 13      | 1.514                           | $8.293(5) \pm 0.062$          | $8.608(2) \pm 0.011$          | $8.280(5) \pm 0.058$          |
| 14      | 1.682                           | $8.230(4) \pm 0.008$          | $8.400(5) \pm 0.078$          | $8.231(4) \pm 0.008$          |
| 15      | 3.365                           | $8.137(3) \pm 0.020$          | $8.225(4) \pm 0.001$          | $8.138(4) \pm 0.024$          |
| 16      | 5.047                           | $8.137(2) \pm 0.009$          | $8.328(1) \pm 0.039$          | $8.167(2) \pm 0.007$          |
| 17      | 6.730                           | $8.197(3) \pm 0.012$          | $8.205(3) \pm 0.328$          | $8.199(3) \pm 0.016$          |
| 18      | 8.412                           | $8.347(1) \pm 0.084$          | $8.501(4) \pm 0.038$          | $8.346(5) \pm 0.068$          |
| 19      | 10.090                          | $8.120(4) \pm 0.064$          | $8.493(3) \pm 0.214$          | $8.094(4) \pm 0.060$          |
| 20      | 11.777                          | $8.133(4) \pm 0.031$          | $8.095(4) \pm 0.068$          | $8.147(4) \pm 0.032$          |
| 21      | 50.000                          | $8.353(2) \pm 0.034$          | $8.527(3) \pm 0.149$          | $8.344(3) \pm 0.037$          |
| 22      | 100.00                          | $8.293(2) \pm 0.063$          | $8.453(2) \pm 0.188$          | $8.285(3) \pm 0.048$          |
| 23      | 500.00                          | $8.296(2) \pm 0.061$          | $8.579(1) \pm 0.132$          | $8.291(3) \pm 0.063$          |
| 24      | 1000.0                          | $8.333(1) \pm 0.101$          | $8.465(3) \pm 0.032$          | $8.364(3) \pm 0.104$          |

Table S15. High-frequency dielectric permittivity,  $\epsilon_\alpha$ , relaxation amplitude  $\Delta\epsilon$ , static permittivity,  $\epsilon_s$ , relaxation time,  $\tau$  of Debye model fitted to the dielectric spectra of 2HPy at room temperature. Reduced error function,  $\chi^2$  in all the solutions were close to unity.

| Sl. No | Conc.(10 <sup>-5</sup> M) | $\epsilon_\alpha$ | $\Delta\epsilon$ | $\epsilon_s$    | $\tau$           |
|--------|---------------------------|-------------------|------------------|-----------------|------------------|
| 1      | Water                     | 5.38(2) ± 0.10    | 73.24(2) ± 0.07  | 78.61(4) ± 0.17 | 8.320(3) ± 0.015 |
| 2      | 0.168                     | 5.80(2) ± 0.77    | 73.63(1) ± 0.58  | 79.43(3) ± 0.70 | 8.273(3) ± 0.129 |
| 3      | 0.252                     | 5.29(1) ± 0.30    | 73.50(1) ± 0.31  | 78.80(2) ± 0.58 | 7.747(1) ± 0.227 |
| 4      | 0.330                     | 3.09(2) ± 3.02    | 73.97(2) ± 0.36  | 77.05(4) ± 2.69 | 7.702(3) ± 0.392 |
| 5      | 0.421                     | 4.95(1) ± 0.21    | 73.90(1) ± 0.72  | 78.86(2) ± 0.59 | 7.973(2) ± 0.083 |
| 6      | 0.505                     | 4.79(2) ± 0.18    | 72.55(1) ± 0.39  | 78.34(3) ± 0.48 | 8.013(3) ± 0.189 |
| 7      | 0.673                     | 5.47(2) ± 0.50    | 72.83(2) ± 0.20  | 78.22(4) ± 0.42 | 8.017(3) ± 0.199 |
| 8      | 0.841                     | 4.95(1) ± 0.37    | 73.03(1) ± 0.49  | 77.99(2) ± 0.86 | 8.053(2) ± 0.115 |
| 9      | 1.001                     | 5.50(1) ± 0.53    | 73.06(1) ± 0.61  | 78.57(2) ± 0.62 | 7.997(2) ± 0.188 |
| 10     | 1.178                     | 5.06(2) ± 0.09    | 73.55(2) ± 0.30  | 78.62(4) ± 0.38 | 7.927(3) ± 0.109 |
| 11     | 1.346                     | 5.18(1) ± 0.13    | 73.44(1) ± 0.41  | 78.62(2) ± 0.54 | 7.977(1) ± 0.121 |
| 12     | 1.430                     | 4.72(1) ± 0.53    | 73.60(1) ± 0.44  | 78.31(2) ± 0.14 | 8.047(2) ± 0.115 |
| 13     | 1.514                     | 4.49(1) ± 0.47    | 73.47(1) ± 0.79  | 77.96(2) ± 1.20 | 8.017(2) ± 0.140 |
| 14     | 1.682                     | 5.11(1) ± 0.08    | 72.92(1) ± 0.39  | 78.02(2) ± 0.46 | 8.007(2) ± 0.060 |
| 15     | 3.365                     | 4.92(1) ± 0.22    | 73.20(1) ± 0.27  | 78.12(2) ± 0.43 | 8.040(1) ± 0.127 |
| 16     | 5.047                     | 5.13(1) ± 0.40    | 73.48(1) ± 0.32  | 78.61(2) ± 0.39 | 8.017(1) ± 0.142 |
| 17     | 6.730                     | 4.94(1) ± 0.31    | 73.41(1) ± 0.56  | 78.34(2) ± 0.26 | 7.877(1) ± 0.165 |
| 18     | 8.412                     | 5.06(1) ± 0.29    | 73.21(1) ± 0.72  | 78.28(2) ± 0.54 | 8.067(1) ± 0.146 |
| 19     | 10.090                    | 5.37(1) ± 0.85    | 73.04(1) ± 0.36  | 78.42(2) ± 0.50 | 7.977(2) ± 0.311 |
| 20     | 11.777                    | 5.08(2) ± 0.07    | 73.38(1) ± 0.45  | 78.46(3) ± 0.39 | 8.093(3) ± 0.144 |
| 21     | 50.000                    | 5.50(2) ± 0.39    | 73.23(2) ± 0.57  | 78.74(2) ± 0.08 | 8.340(2) ± 0.062 |
| 22     | 100.00                    | 5.80(2) ± 0.54    | 73.64(2) ± 0.44  | 78.45(2) ± 0.24 | 8.407(1) ± 0.020 |
| 23     | 500.00                    | 5.89(2) ± 0.56    | 72.75(2) ± 0.61  | 78.65(2) ± 0.23 | 8.390(3) ± 0.071 |
| 24     | 1000.0                    | 5.76(1) ± 0.23    | 72.63(1) ± 0.59  | 78.38(1) ± 0.39 | 8.343(3) ± 0.104 |

Table S16. High-frequency dielectric permittivity,  $\epsilon_\omega$ , relaxation amplitude  $\Delta\epsilon$ , static permittivity,  $\epsilon_s$ , relaxation time,  $\tau$  of Debye model fitted to the dielectric spectra of 2MPy at room temperature. Reduced error function,  $\chi^2$  in all the solutions were close to unity

| Sl. No | Conc. ( $10^{-5}$ M) | $\epsilon_\omega$  | $\Delta\epsilon$    | $\epsilon_s$        | $\tau$               |
|--------|----------------------|--------------------|---------------------|---------------------|----------------------|
| 1      | Water                | 5.38(2) $\pm$ 0.10 | 73.24(2) $\pm$ 0.07 | 78.61(4) $\pm$ 0.17 | 8.320(3) $\pm$ 0.015 |
| 2      | 0.168                | 4.80(2) $\pm$ 0.35 | 73.15(1) $\pm$ 0.40 | 77.95(3) $\pm$ 0.16 | 8.043(2) $\pm$ 0.115 |
| 3      | 0.252                | 5.52(4) $\pm$ 0.31 | 74.06(3) $\pm$ 0.80 | 79.57(1) $\pm$ 0.52 | 8.337(1) $\pm$ 0.104 |
| 4      | 0.336                | 5.49(3) $\pm$ 1.20 | 73.37(3) $\pm$ 1.70 | 78.83(1) $\pm$ 0.48 | 8.150(5) $\pm$ 0.265 |
| 5      | 0.421                | 5.32(3) $\pm$ 0.16 | 73.40(2) $\pm$ 0.17 | 78.73(5) $\pm$ 0.05 | 8.360(5) $\pm$ 0.037 |
| 6      | 0.505                | 5.75(2) $\pm$ 0.31 | 72.61(1) $\pm$ 0.47 | 78.37(3) $\pm$ 0.42 | 8.280(3) $\pm$ 0.043 |
| 7      | 0.673                | 4.72(3) $\pm$ 0.27 | 73.34(2) $\pm$ 0.48 | 78.07(5) $\pm$ 0.24 | 8.030(4) $\pm$ 0.082 |
| 8      | 0.841                | 5.07(3) $\pm$ 0.42 | 73.13(3) $\pm$ 0.90 | 78.20(1) $\pm$ 0.51 | 8.093(5) $\pm$ 0.074 |
| 9      | 1.009                | 4.79(3) $\pm$ 0.88 | 73.47(2) $\pm$ 1.32 | 78.23(5) $\pm$ 0.52 | 8.040(4) $\pm$ 0.115 |
| 10     | 1.178                | 5.69(2) $\pm$ 0.29 | 73.24(1) $\pm$ 0.41 | 78.93(3) $\pm$ 0.24 | 8.283(3) $\pm$ 0.083 |
| 11     | 1.346                | 5.43(3) $\pm$ 0.49 | 72.04(3) $\pm$ 0.52 | 77.61(1) $\pm$ 0.15 | 8.047(5) $\pm$ 0.085 |
| 12     | 1.430                | 4.86(2) $\pm$ 0.01 | 73.55(2) $\pm$ 0.20 | 78.41(3) $\pm$ 0.19 | 8.053(3) $\pm$ 0.009 |
| 13     | 1.514                | 5.52(3) $\pm$ 0.14 | 72.71(3) $\pm$ 0.22 | 78.22(1) $\pm$ 0.14 | 8.293(5) $\pm$ 0.062 |
| 14     | 1.682                | 4.73(3) $\pm$ 0.07 | 74.38(2) $\pm$ 0.26 | 79.12(5) $\pm$ 0.30 | 8.230(4) $\pm$ 0.008 |
| 15     | 3.365                | 5.03(2) $\pm$ 0.12 | 73.56(2) $\pm$ 0.31 | 78.90(4) $\pm$ 0.07 | 8.137(3) $\pm$ 0.020 |
| 16     | 5.047                | 4.76(1) $\pm$ 0.03 | 73.20(1) $\pm$ 1.05 | 77.87(3) $\pm$ 1.13 | 8.137(2) $\pm$ 0.009 |
| 17     | 6.730                | 5.04(2) $\pm$ 0.09 | 73.69(2) $\pm$ 0.17 | 78.74(4) $\pm$ 0.26 | 8.197(3) $\pm$ 0.012 |
| 18     | 8.412                | 5.80(4) $\pm$ 0.42 | 72.20(3) $\pm$ 1.30 | 78.00(1) $\pm$ 0.99 | 8.347(1) $\pm$ 0.084 |
| 19     | 10.094               | 5.56(3) $\pm$ 0.20 | 72.14(2) $\pm$ 0.34 | 77.71(5) $\pm$ 0.18 | 8.120(4) $\pm$ 0.064 |
| 20     | 11.776               | 4.80(3) $\pm$ 0.30 | 74.07(2) $\pm$ 0.60 | 78.87(5) $\pm$ 0.43 | 8.133(4) $\pm$ 0.031 |
| 21     | 50.000               | 5.24(2) $\pm$ 0.57 | 73.48(2) $\pm$ 0.57 | 78.72(2) $\pm$ 0.44 | 8.353(2) $\pm$ 0.034 |
| 22     | 100.00               | 4.65(2) $\pm$ 0.44 | 73.54(2) $\pm$ 0.44 | 78.18(2) $\pm$ 0.10 | 8.293(2) $\pm$ 0.063 |
| 23     | 500.00               | 4.87(2) $\pm$ 0.61 | 72.73(2) $\pm$ 0.61 | 78.60(2) $\pm$ 0.04 | 8.296(2) $\pm$ 0.061 |
| 24     | 1000.0               | 5.43(1) $\pm$ 0.59 | 73.03(1) $\pm$ 0.59 | 78.46(1) $\pm$ 0.21 | 8.333(1) $\pm$ 0.101 |

## References:

1. A. Albert and E. P. Serjeant, *The determination of ionization constants: a laboratory manual*, Chapman and Hall, London, 1984.
2. A. Albert and J. N. Phillips, *J. Chem.Soc.,(Resumed)*, 1956, DOI: 10.1039/JR9560001294, 1294-1304
3. R. A. Jones and A. R. Katritzky, *J. Chem. Soc. (Resumed)*, 1958, **0**, 3610-3613.
4. A. Habibi-Yangjeh, E. Pourbasheer, and M. Danandeh-Jenagharad, *Monatsh.Chem.*, 2009, **140**, 15-27.
